# Supplementary material for: Standalone anion- and co-doped titanium dioxide nanotubes for photocatalytic and photoelectrochemical solar-to-fuel conversion
Source: Royal Society of Chemistry journal article supplement (doi:10.1039/c6nr05742j), 2016-01-01
Supplement: c6nr05742j1.pdf [file c6nr05742j1.pdf]

# Standalone anion- and co-doped titanium dioxide nanotubes for photocatalytic and photoelectrochemical solar-to-fuel conversion

*Yuchen Ding,<sup>1</sup> Prashant Nagpal<sup>2,3,4</sup>*

1 Chemistry and Biochemistry, University of Colorado Boulder

2 Chemical and Biochemical Engineering, University of Colorado Boulder

3 Materials Science and Engineering, University of Colorado Boulder

4 Renewable and Sustainable Energy Institute (RASEI), University of Colorado Boulder,  
Boulder, CO 80303

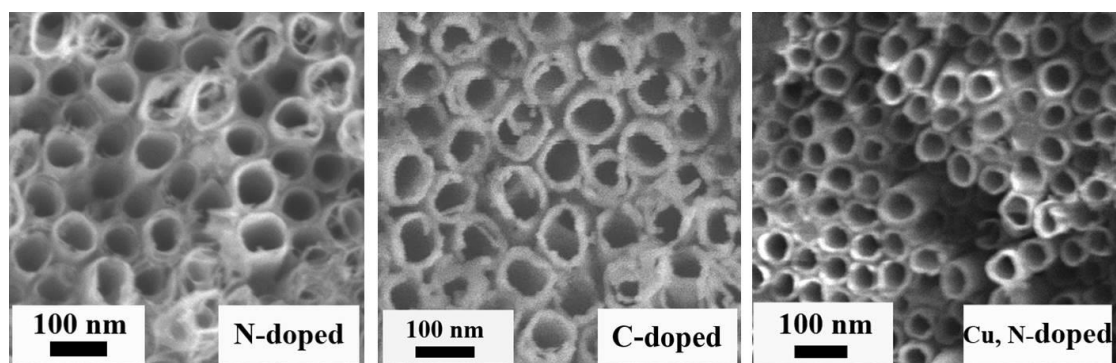

**Figure S1.** Field emission scanning electron micrographs (FE-SEM) of doped TiO<sub>2</sub> nanotubes.

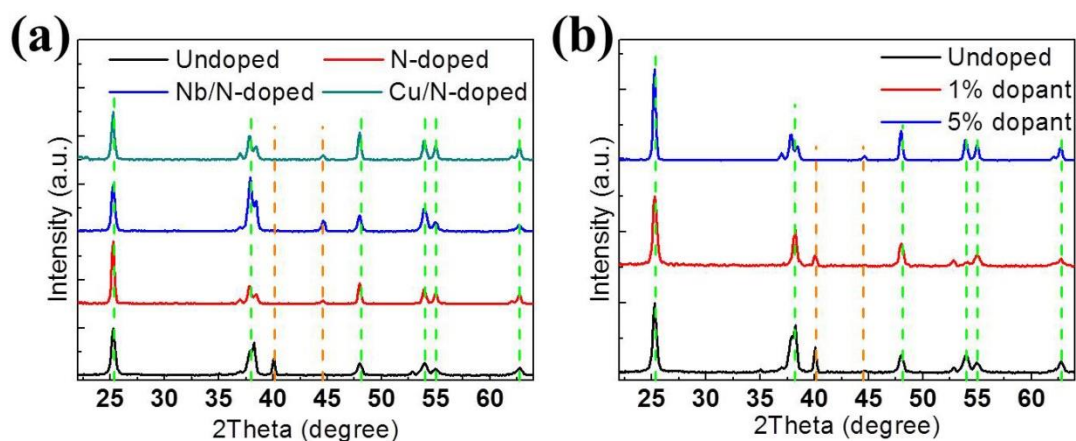

**Figure S2.** X-ray powder diffraction (XRD) spectroscopy of (a) undoped, anion-doped, and co-doped nanotubes, (b) nanotubes with different dopant level. The dash-green and dash-orange line indicate characteristic peaks for anatase  $\text{TiO}_2$  and titanium (from the substrate), respectively.

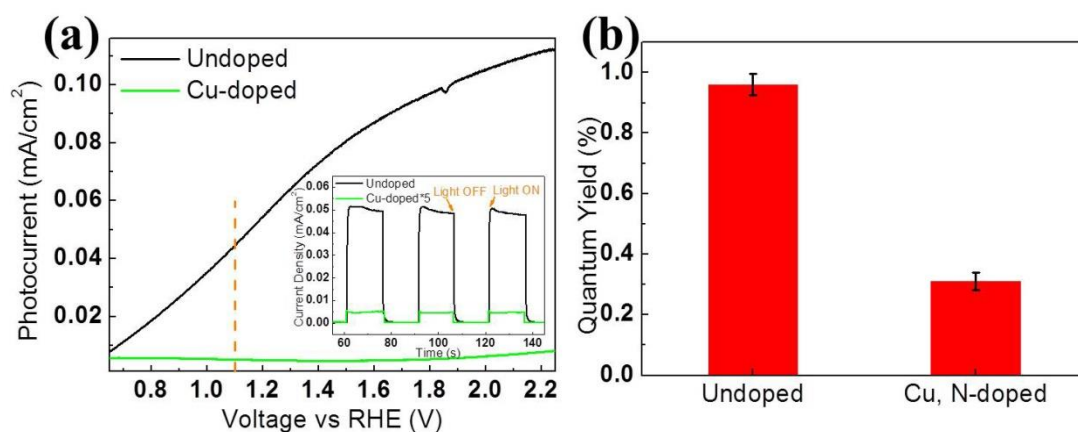

**Figure S3.** (a) Linear sweep voltammetry of undoped and Cu-doped samples showing the photocurrent density under AM 1.5 (1 SUN) irradiation. The inset is the light ON-OFF current density measurement taken at 500 mV bias vs. Ag/AgCl reference. (b) Quantum yield of Cu, N-codoped  $\text{TiO}_2$  nanotubes compared to undoped sample, extracted from methylene blue (MB) test.

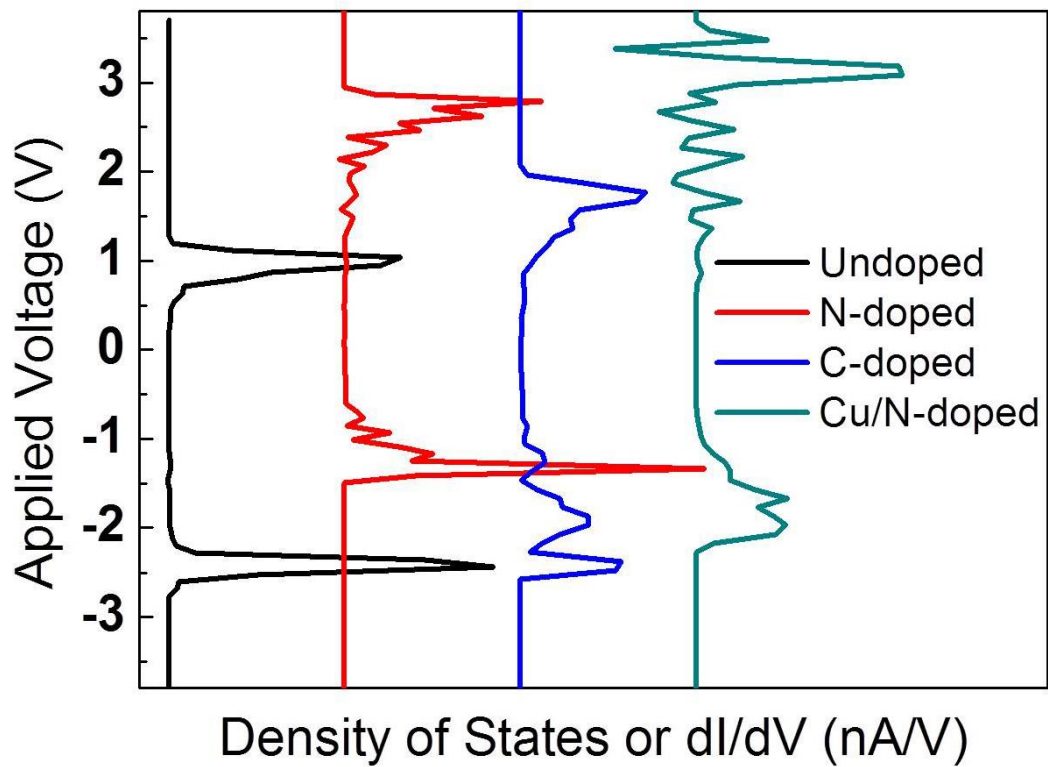

**Figure S4.** Scanning tunneling spectroscopy (STS) of undoped/doped TiO<sub>2</sub> nanotubes showing the density of states (DOS).

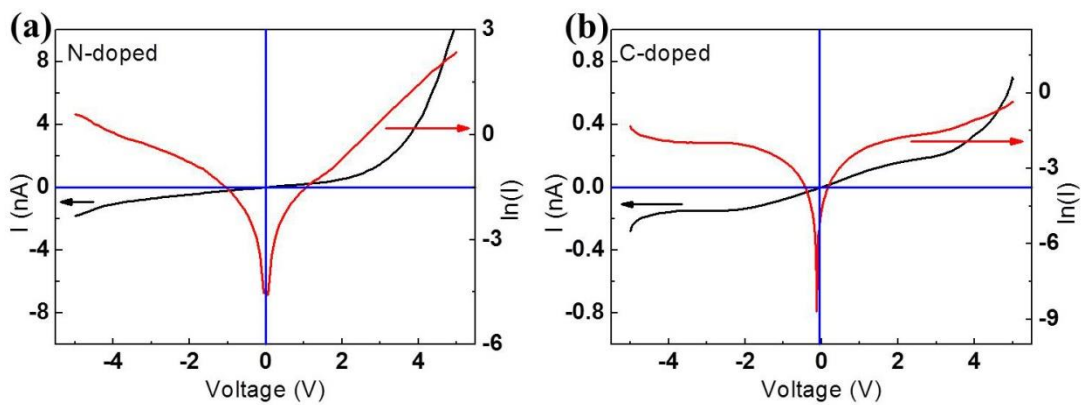

**Figure S5.** Current-sensing atomic force microscopy (CS-AFM) measurement of (a) N-doped and (b) C-doped TiO<sub>2</sub> nanotubes, showing both the  $I$ - $V$  and  $\ln(I)$ - $V$  characters.

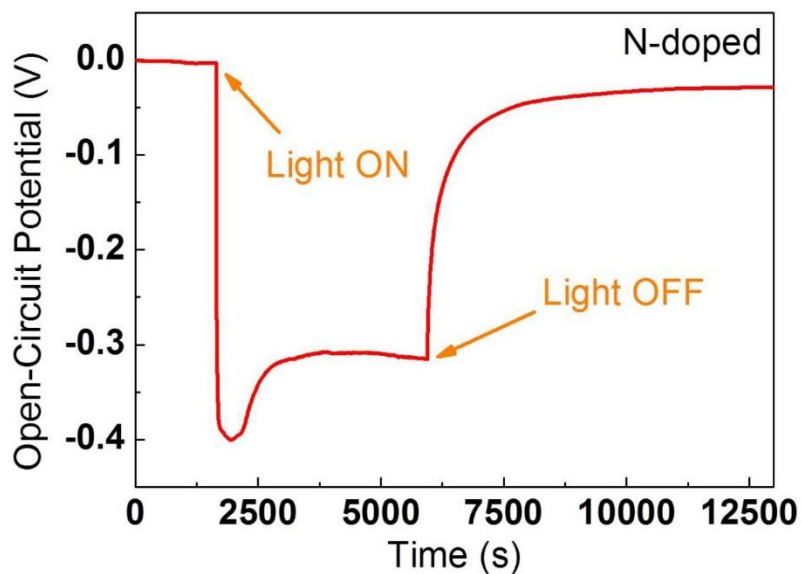

**Figure S6.** Change of Open-circuit potential with UV light on and off for N-doped TiO<sub>2</sub> nanotubes.

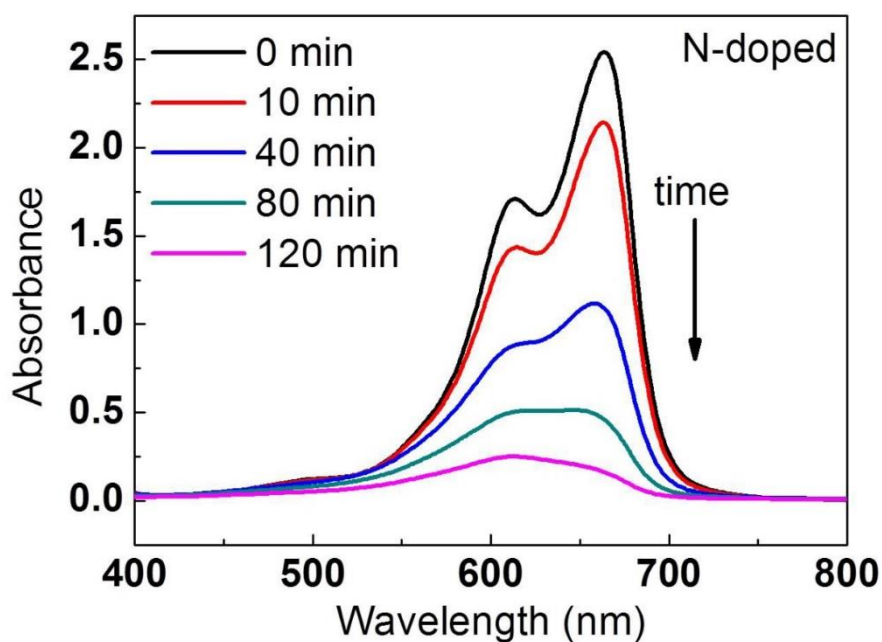

**Figure S7.** UV-VIS spectrum of methylene blue (MB). The decrease of absorption shows photocatalytic degradation of MB with N-doped TiO<sub>2</sub> nanotubes.
